# Supplementary material
Source: Springer Nature journal article supplement (https://www.springermedizin.de/resource/supplementary/12889_2013_6148_MOESM4_ESM.pdf/9494318)
Supplement: MOESM4 [file 9494318]

# Areas of assessment based on WHO recommendations

Enabling policy environment and networks

Protocols

Training

Accountability and monitoring

Prevention and promotion

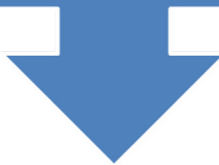

## Data collection and analysis

Documentary review guided by set of indicators  
Regional and national documents

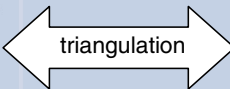

Qualitative content analysis of interviews  
26 civil servants coordinating IPV response in the 17 RHSs and nationally

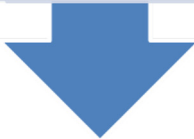

## Member checking

Preliminary results returned to the 17RHSs for comments  
Reply from 9 RHSs and comments incorporated
